# Supplementary material
Source: Research Square preprint supplement (doi:10.21203/rs.3.rs-9887205/v1)
Supplement: Supplementary file 1 [file 80241b66a105615eeade0af5.docx]

**SUPPLEMENTARY MATERIAL.**

***Intrinsic Capacity Index and Cross-sectional Associations with Geriatric Outcomes in Community-Dwelling Older Adults.*** *European Journal of Ageing*

Lucía Sáez-González*1, Lucía Castro-Vázquez1, Luis A. Martínez1, 3, José Antonio Carbajal de Lara1, 4, Rosa M. Martinez-Garcia2, G. Blázquez Abellán1

*Correspondence to: [lucia.saez@uclm.es](mailto:lucia.saez@uclm.es)

1 NUTRISAF Research Group, Faculty of Pharmacy, University of Castilla-La Mancha (UCLM), Avda. Doctor Jose María Sanchez Ibañez s/n, 02008 Albacete, Spain

2 NUTRISAF Research Group, Faculty of Nursing, University of Castilla-La Mancha (UCLM), Camino Pozuelo s/n, 16071 Cuenca, Spain

3 Tiriez Community Pharmacy, Albacete, 02161, Spain

4 Community Pharmacy Jose Antonio Carbajal de Lara, Albacete, 02004, Spain

***Supplementary material 1. Distribution and internal structure of ICI***

**
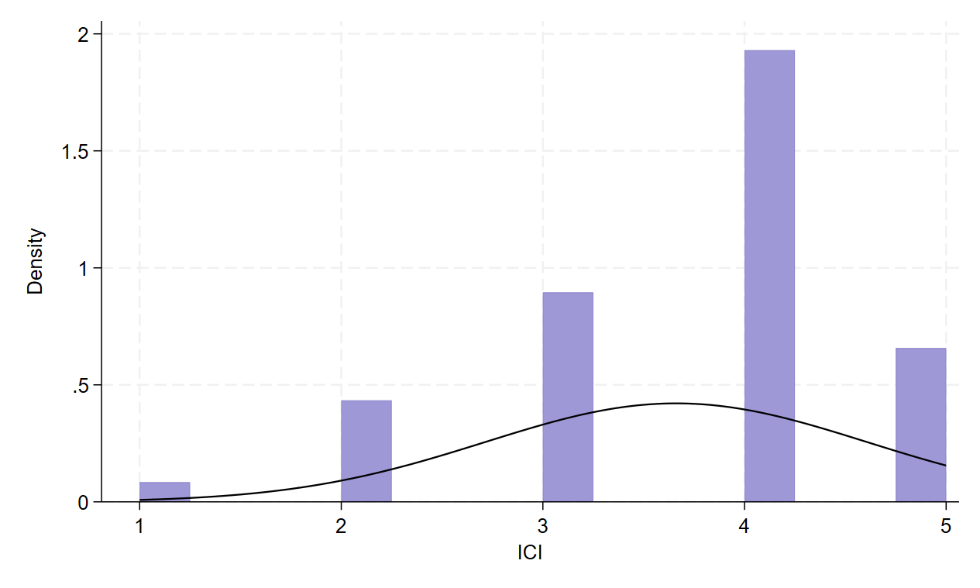
**

**
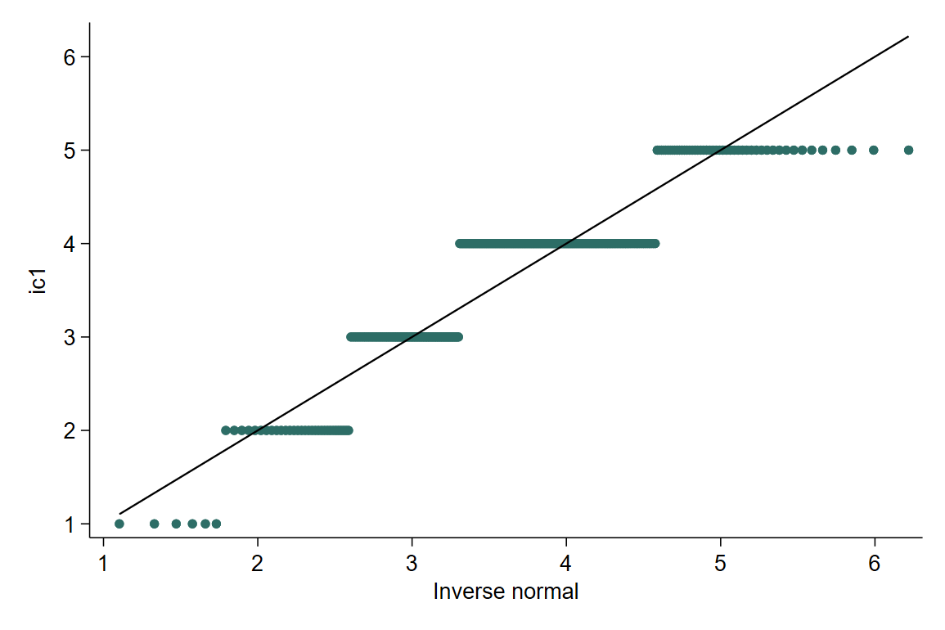
**

***
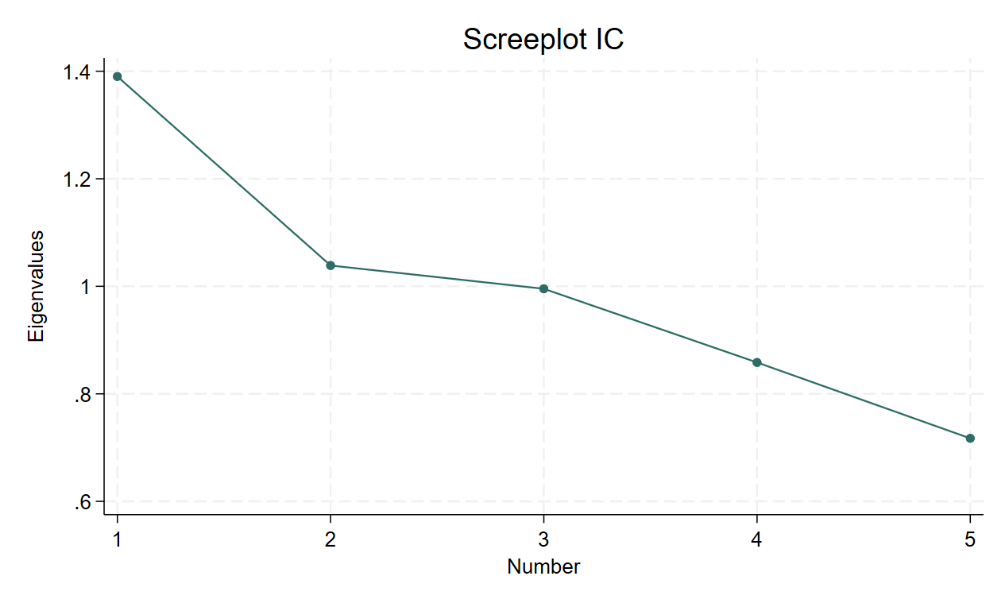
***

***Supplementary material 2. Bivariate associations of ICI with aging health-related outcomes***

1. **Frailty**

| Table 2a. ICI by Frailty Status | | | | | |
| --- | --- | --- | --- | --- | --- |
|  | Frailty | | | | |
|  | Robust | Prefrail | Frail | Total | Test |
| N | 146 (57.0%) | 56 (21.9%) | 54 (21.1%) | 256 (100.0%) |  |
| ICI | 3.94 (0.781) | 3.64 (0.943) | 2.96 (0.999) | 3.66 (0.951) | <0.001 |

1. **BADL Independence (Barthel Index)**

| Table 2B. ICI by BADL Independence Barthel Index | | | | |
| --- | --- | --- | --- | --- |
|  | BADL | | | |
|  | Independent | Dependent (Barthel<90) | Total | Test |
| N | 276 (96.5%) | 10 (3.5%) | 286 (100.0%) |  |
| ICI | 3.710 (0.912) | 2.300 (0.949) | 3.661 (0.948) | <0.001 |

1. **IADL Independence (Lawton&Brody Scale)**

| Table 2C. ICI by IADL Lawton & Brody Scale | | | | |
| --- | --- | --- | --- | --- |
|  | IADL | | | |
|  | Independent | Dependent (Lawton&Brody<8) | Total | Test |
| N | 238 (83.2%) | 48 (16.8%) | 286 (100.0%) |  |
| ICI | 3.727 (0.912) | 3.333 (1.059) | 3.661 (0.948) | 0.008 |

1. **Polypharmacy (≥5 APi)**

| Table 2d. ICI by Polypharmacy | | | | |
| --- | --- | --- | --- | --- |
|  | Polypharmacy | | | |
|  | Non-polymedicated | Polypharmacy (≥5 APi) | Total | Test |
| N | 127 (44.4%) | 159 (55.6%) | 286 (100.0%) |  |
| ICI | 3.906 (0.801) | 3.465 (1.011) | 3.661 (0.948) | <0.001 |

1. **Depression (antidepressants)**

| Table 2e. ICI by Antidepressants | | | | |
| --- | --- | --- | --- | --- |
|  | Antidepressants | | | |
|  | Not medicated | Medicated | Total | Test |
| N | 248 (86.7%) | 38 (13.3%) | 286 (100.0%) |  |
| ICI | 3.762 (0.911) | 3.000 (0.930) | 3.661 (0.948) | <0.001 |

1. **Anxiety (anxiolytics)**

| Table 2f. ICI by Anxiolytics | | | | |
| --- | --- | --- | --- | --- |
|  | Anxiolytics | | | |
|  | Not medicated | Medicated | Total | Test |
| N | 226 (79.0%) | 60 (21.0%) | 286 (100.0%) |  |
| ICI | 3.730 (0.939) | 3.400 (0.942) | 3.661 (0.948) | 0.016 |

1. **Either taking anxiolytics or antidepressants**

| Table 2g. ICI by either N05 or N06 or both | | | | |
| --- | --- | --- | --- | --- |
|  | Psych. medication | | | |
|  | Not medicated | Medicated | Total | Test |
| N | 202 (70.6%) | 84 (29.4%) | 286 (100.0%) |  |
| ICI | 3.802 (0.904) | 3.321 (0.971) | 3.661 (0.948) | <0.001 |

1. **Hypertension**

| Table 2h. ICI by Hypertension | | | | |
| --- | --- | --- | --- | --- |
|  | Hypertension | | | |
|  | Not medicated | Medicated | Total | Test |
| N | 137 (47.9%) | 149 (52.1%) | 286 (100.0%) |  |
| ICI | 3.796 (0.884) | 3.537 (0.990) | 3.661 (0.948) | 0.021 |

1. **Hypercholesterolemia**

| Table 2i. ICI by Hypercholesterolemia | | | | |
| --- | --- | --- | --- | --- |
|  | Hypercholesterolemia | | | |
|  | Not medicated | Medicated | Total | Test |
| N | 120 (42.0%) | 166 (58.0%) | 286 (100.0%) |  |
| ICI | 3.792 (0.978) | 3.566 (0.917) | 3.661 (0.948) | 0.047 |

1. **Diabetes**

| Table 2j. ICI by Diabetes | | | | |
| --- | --- | --- | --- | --- |
|  | Diabetes | | | |
|  | Not medicated | Medicated | Total | Test |
| N | 225 (78.7%) | 61 (21.3%) | 286 (100.0%) |  |
| ICI | 3.733 (0.945) | 3.393 (0.918) | 3.661 (0.948) | 0.013 |

1. **Metabolic Syndrome**

| Table 2k. ICI by Metabolic Syndrome | | | | |
| --- | --- | --- | --- | --- |
|  | Metabolic Syndrome | | | |
|  | No MS | Metabolic Syndrome (≥3 factors) | Total | Test |
| N | 181 (63.3%) | 105 (36.7%) | 286 (100.0%) |  |
| ICI | 3.762 (0.915) | 3.486 (0.982) | 3.661 (0.948) | 0.017 |

1. **Adherence to treatment**

| Table 2l. ICI by Adherence to treatment | | | | |
| --- | --- | --- | --- | --- |
|  | Treatment Adherence | | | |
|  | Adherent | Non-adherent | Total | Test |
| N | 188 (65.7%) | 98 (34.3%) | 286 (100.0%) |  |
| ICI | 3.755 (0.927) | 3.480 (0.966) | 3.661 (0.948) | 0.019 |

***Supplementary material 3. Continuous variables correlations with ICI***

|  | *ICI* | *Age* | *Cognitive Reserve* | *MEDAS* | *Number of API* | *IADL* | *BADL* |
| --- | --- | --- | --- | --- | --- | --- | --- |
| *ICI* | *1.0000* |  |  |  |  |  |  |
| *Age* | *-0.2398**** | *1.0000* |  |  |  |  |  |
| *Cognitive Reserve* | *0.4202**** | *-0.3300**** | *1.000* |  |  |  |  |
| *MEDAS* | *0.2060**** | *-0.0577* | *0.2753**** | *1.000* |  |  |  |
| *Number of API* | *-0.3697**** | *0.2264**** | *-0.1695*** | *-0.1276** | *1.000* |  |  |
| *IADL* | *0.1821*** | *-0.2642**** | *0.2452**** | *0.1364** | *-0.1307** | *1.0000* |  |
| *BADL* | *0.3114**** | *-0.2999**** | *0.3267**** | *0.0620* | *-0.2236**** | *0.4927**** | *1.0000* |

**significance at p<0.05; ** significance at p<0.01;***significance at p<0.001*
